# Supplementary material for: Uncertainty-bounded estimates of ash cloud properties using the ORAC algorithm: application to the 2019 Raikoke eruption
Source: Copernicus journal article supplement (doi:10.5194/amt-15-5985-2022), 2022-10-20
Supplement: Supplementary file 1 [file amt-15-5985-2022-supplement.zip]

Archive with 2 entries (2 files):
- supplementary_animation1.mp4
- amt-15-5985-2022-supplement-title-page.pdf
