# Supplementary material for: Uncertainty-bounded estimates of ash cloud properties using the ORAC algorithm: application to the 2019 Raikoke eruption
Source: Copernicus journal article supplement (doi:10.5194/amt-15-5985-2022), 2022-10-20
Supplement: Supplementary file 1 [file amt-15-5985-2022-supplement.zip › amt-15-5985-2022-supplement-title-page.pdf]

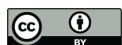

*Supplement of*

## **Uncertainty-bounded estimates of ash cloud properties using the ORAC algorithm: application to the 2019 Raikoke eruption**

**Andrew T. Prata et al.**

*Correspondence to:* Andrew T. Prata ([andrew.prata@physics.ox.ac.uk](mailto:andrew.prata@physics.ox.ac.uk))

- [amt-15-5985-2022-supplement-title-page.pdf](#)
- [supplementary\\_animation1.mp4](#)

The copyright of individual parts of the supplement might differ from the article licence.
